# Supplementary material for: Rosarugosides A and D from Rosa rugosa Flower Buds: Their Potential Anti-Skin-Aging Effects in TNF-α-Induced Human Dermal Fibroblasts
Source: MDPI journal article supplement (doi:10.3390/plants13091266), 2024-05-02

# Rosarugosides A and D from *Rosa rugosa* Flower Buds: Their Potential Anti-Skin-Aging Effects in TNF- $\alpha$ -Induced Human Dermal Fibroblasts

Kang Sub Kim <sup>1</sup>, So-Ri Son <sup>2</sup>, Yea Jung Choi <sup>1</sup>, Yejin Kim <sup>2</sup>, Si-Young Ahn <sup>3</sup>, Dae Sik Jang <sup>2,\*</sup> and Sullim Lee <sup>3,\*</sup>

<sup>1</sup> College of Korean Medicine, Gachon University, Seongnam 13120, Republic of Korea; kangsub@gachon.ac.kr (K.S.K.); domdada22@gachon.ac.kr (Y.J.C.)

<sup>2</sup> Department of Biomedical and Pharmaceutical Sciences, Graduate School, Kyung Hee University, Seoul 02447, Republic of Korea; allosori@khu.ac.kr (S.-R.S.); yezeen@khu.ac.kr (Y.K.)

<sup>3</sup> Department of Life Science, College of Bio-Nano Technology, Gachon University, Seongnam 13120, Republic of Korea; sy990303@gachon.ac.kr

\* Correspondence: author: dsjang@khu.ac.kr (D.S.J.); sullimlee@gachon.ac.kr (S.L.)

## Contents

### Instruments and reagents

### Supplementary figures

Figure S1. HR-MS spectrum and the element analysis result of compound **1**.

Figure S2. <sup>1</sup>H-NMR spectrum of compound **1** [500 MHz, 0.1% C<sub>2</sub>DF<sub>3</sub>O<sub>2</sub> (TFA) in D<sub>2</sub>O].

Figure S3. <sup>13</sup>C-NMR spectrum of compound **1** [125 MHz, 0.1% C<sub>2</sub>DF<sub>3</sub>O<sub>2</sub> (TFA) in D<sub>2</sub>O].

Figure S4. <sup>1</sup>H-<sup>13</sup>C HSQC spectrum of compound **1**.

Figure S5. <sup>1</sup>H-<sup>1</sup>H COSY spectrum of compound **1**.

Figure S6. <sup>1</sup>H-<sup>13</sup>C HMBC spectrum of compound **1**.

Figure S7. <sup>1</sup>H-<sup>1</sup>H NOESY spectrum of compound **1**.

Figure S8. IR spectrum of compound **1**.

Figure S9. Extracted Ion Chromatogram (EIC) for sugar analysis of L-glucose, D-glucose and, hydrolyzed compound **1**.

Figure S10. The effect of compounds **1** and **2** on NHDF cell viability. The cells were treated with (1–100  $\mu$ M) concentrations of the compound for 24 h. The effects of the compounds on cell viability were performed using an EZ-Cytox solution. The data were depicted as mean  $\pm$  SD ( $n=3$ ).

## Instruments and reagents

For the column chromatography, Diaion HP-20 (Mitsubishi Chemical Industries, Ltd., Japan), Sephadex LH-20 (Sigma-Aldrich, USA) were used as stationary phases. Subfractions were monitored by thin-layer chromatography [silica gel 60 F254 (Merck, USA) and RP-18 F254S (Merck, USA)], together with 20% H<sub>2</sub>SO<sub>4</sub> as the spray reagent. The reverse phase MPLC was applied using Combi Flash Rf200 (Teledyne Isco., USA) with Redi Sep-C18 column (26 g, 43 g, and 130 g) was used. Preparative HPLC was performed with Waters HPLC purification system [1525 pump and 996 PDA detector (Waters, USA)] equipped with preparative HPLC columns [Gemini NX-C18 110A (250 × 21.2 mm i.d., 5 µm, Phenomenex, USA) and J'sphere ODS-M80 column (250 × 200, 4.0 µm, YMC, Tokyo, Japan)].

For the structure elucidation of isolated compounds, GENESYS 10 Scanning UV/Visible Spectrophotometer (Thermo Scientific, USA) was used to measure the  $\lambda_{\max}$  value of compounds. For the optical rotation analysis, P-2000 polarimeter (JASCO, Japan) was employed. An IR spectrum was obtained using the FT-IR-4200 (JASCO, Japan). The NMR spectrum was acquired by ECA-500MHz NMR spectrometer (JEOL, Japan). High-resolution (HR) mass spectra were collected utilizing the ESI ion source (Ionsense, Japan) coupled to an AccuTOF-TLC single-reflectron time-of-flight mass spectrometer (JEOL, Japan). For the sugar analysis, Vanquish UHPLC-DAD equipped with Hypersil GOLD C18 column (150 × 2.1 mm, 1.9 µm, Thermo scientific, USA) and LTQ-XL ion trap mass spectrometer (Thermo Scientific) were employed.

For the cell culture, normal human dermal fibroblasts (NHDF) from PromoCell GmbH (Sickingenstr, Heidelberg, Germany) were used. Dulbecco's Modified Eagle's Medium (DMEM; Gibco, Grand Island, NY, USA) and FBS (Atlas, Fort Collins, CO, USA) was utilized as the culture medium. Cell viability was assessed by MTT assay with EZ-cytox solution (DoGenBio, Seoul, Republic of Korea). A microplate reader was employed for measuring optical density values by the EnSpire multimode plate reader (PerkinElmer, Waltham, MA, USA).

To detect reactive oxygen species (ROS) production, the fluorescent probe 2',7'-dichlorodihydrofluorescein diacetate (DCFDA; Sigma-Aldrich, Burlington, USA) was utilized. The MMP-1 and procollagen type I  $\alpha 1$  ELISA assays were conducted using ELISA Kit (R&D Systems, Inc., Minneapolis, MN, USA).

## Supplementary figures

Figure S1. HR-MS spectrum and the element analysis result of compound **1**.

RORU2-K6\_[M+Na]<sup>+</sup>

Data: 240415\_RORU\_DV2100\_PV1200\_O40  
 Sample Name:  
 Description:  
 Ionization Mode: ESI+  
 History: Determine m/z [Peak Detect (Centroid, 20, Area); Correct Base (3.0%); Correct Base (5.0%); Average (MS[1] 0.4...]

Acquired: 4/15/2024 5:16:10 PM  
 Operator: Administrator  
 Mass Calibration data: 240415\_Yoku\_POS  
 Created: 4/15/2024 5:28:47 PM  
 Created by: Administrator

Charge number: 1  
 Element: <sup>12</sup>C: 0 .. 100, <sup>1</sup>H: 0 .. 200, <sup>23</sup>Na: 1 .. 1, <sup>16</sup>O: 0 .. 13  
 Tolerance: 5.00 (ppm), 5.00 .. 15.00 (mmu)  
 Unsaturation Number: -1.5 .. 20.0 (Fraction: Both)

| Mass      | Intensity | Calc. Mass | Mass Difference (mmu) | Possible Formula                                                                                          | Unsaturation Number |
|-----------|-----------|------------|-----------------------|-----------------------------------------------------------------------------------------------------------|---------------------|
| 505.09658 | 133914.11 | 505.09581  | 0.77                  | <sup>12</sup> C <sub>21</sub> <sup>1</sup> H <sub>22</sub> <sup>23</sup> Na <sup>16</sup> O <sub>13</sub> | 10.5                |

Acq. Data Name: 240415\_RORU\_DV2100\_PV1200\_O40  
 Internal Sample Id:  
 Ionization Mode: ESI+  
 MS Calibration Name: 221101\_Yoku-3000  
 Reduction History: Determine m/z [Peak Detect (Centroid, 20, Area); Correct Base (3.0%); Correct Base (5.0%); Average (MS[1] 0.486..0.563)]  
 Experiment Date/Time: 4/15/2024 5:16:10 PM  
 Spec. Record Interval: 0.5[s]  
 Time of Maximum: 0.524 [min]  
 Operator Name: Administrator

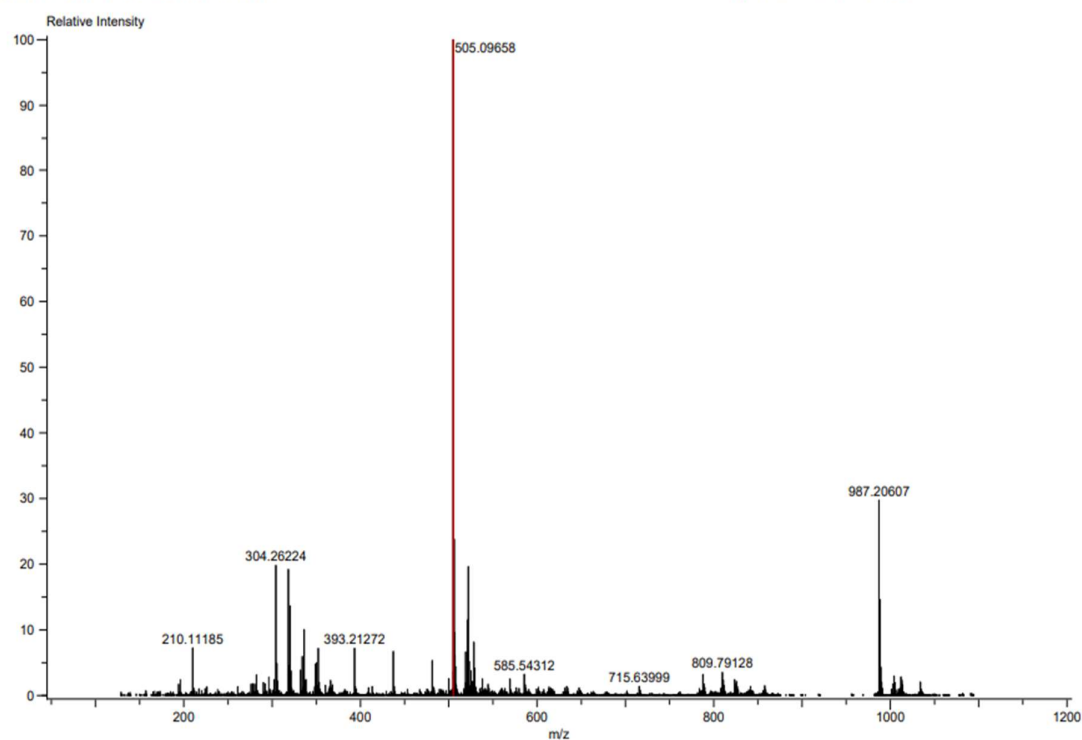

Figure S2. <sup>1</sup>H-NMR spectrum of compound **1** [500 MHz, 0.1% C<sub>2</sub>DF<sub>3</sub>O<sub>2</sub> (TFA) in D<sub>2</sub>O].

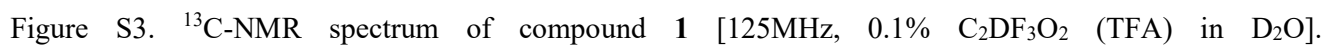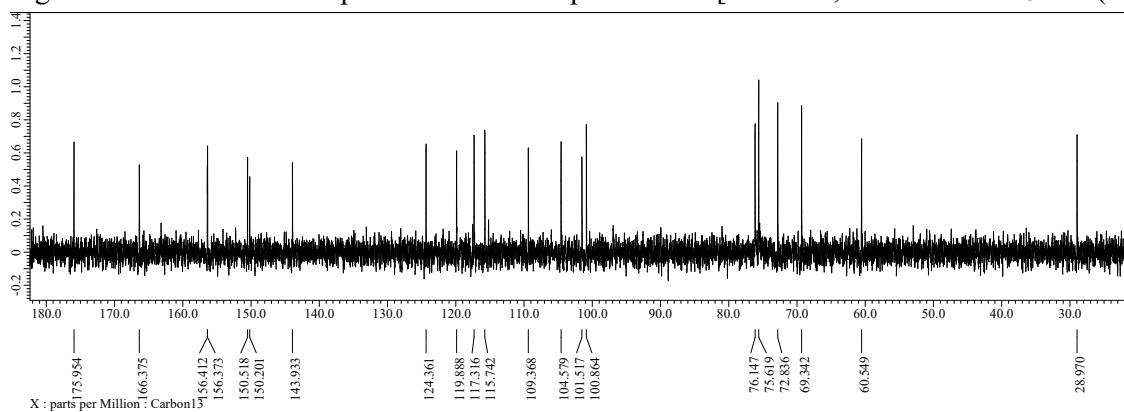

Figure S4.  $^1\text{H}$ - $^{13}\text{C}$  HSQC spectrum of compound 1.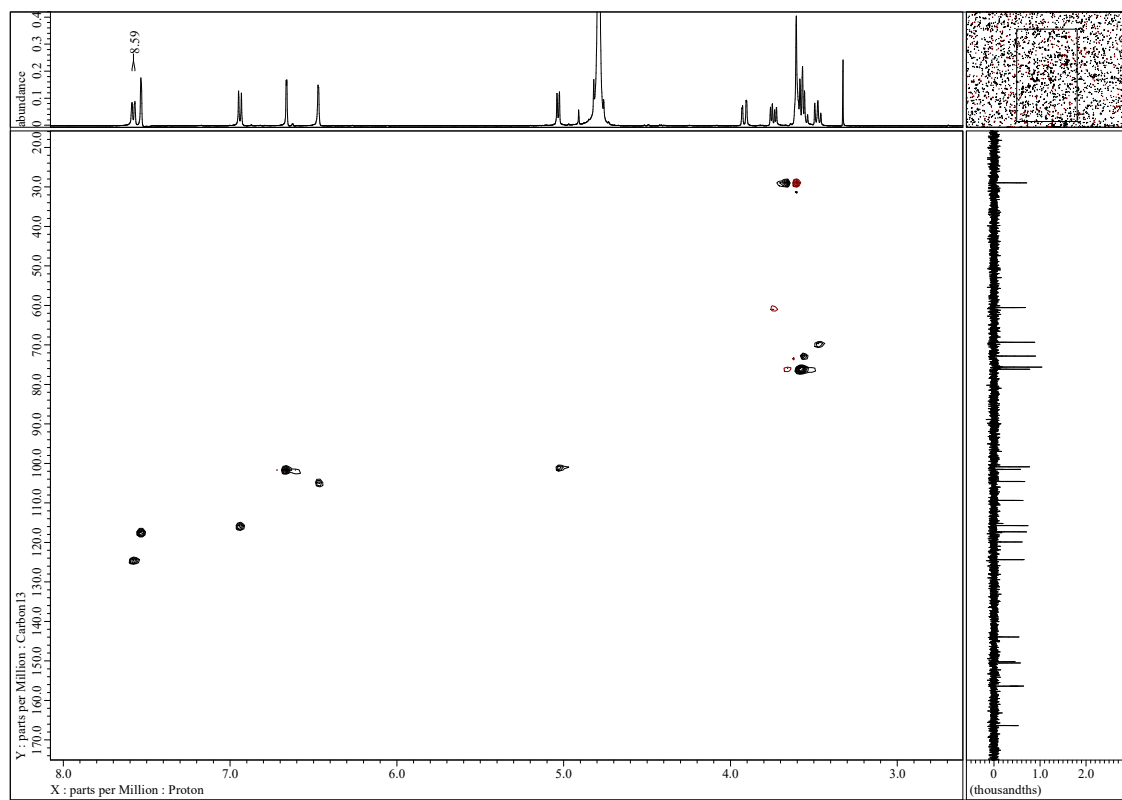

Figure S5.  $^1\text{H}$ - $^1\text{H}$  COSY spectrum of compound **1**.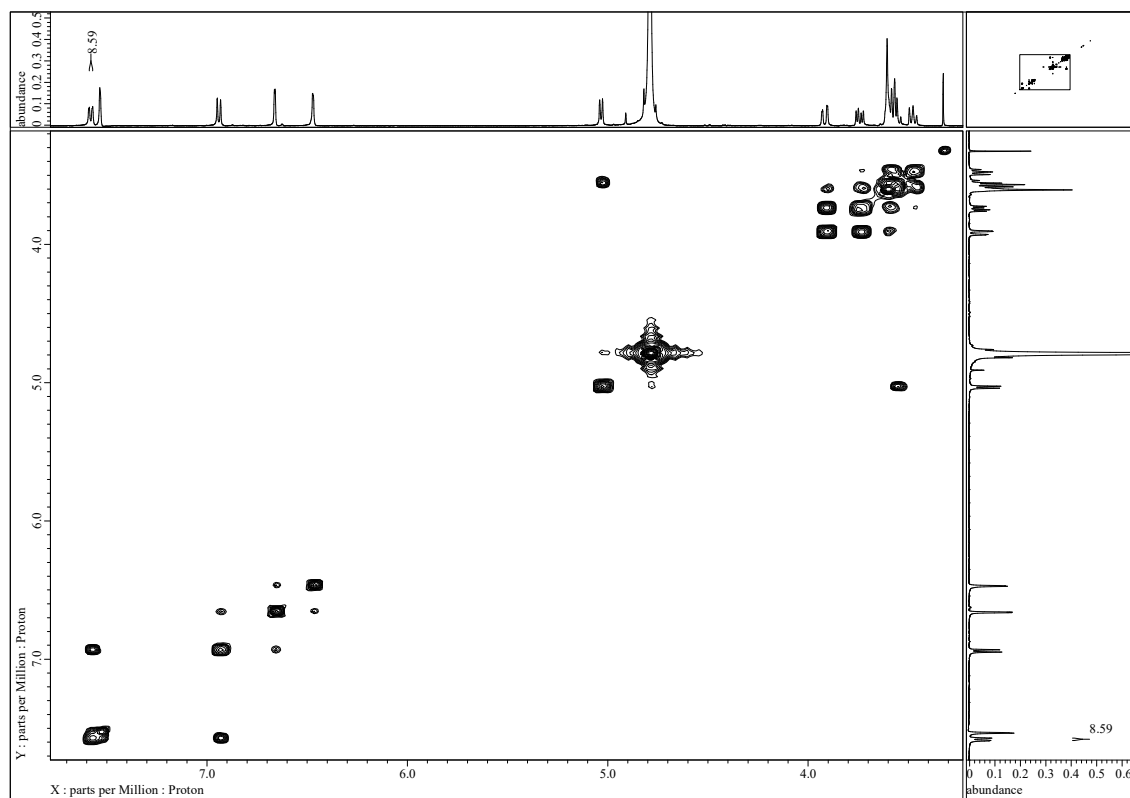

Figure S6.  $^1\text{H}$ - $^{13}\text{C}$  HMBC spectrum of compound **1**.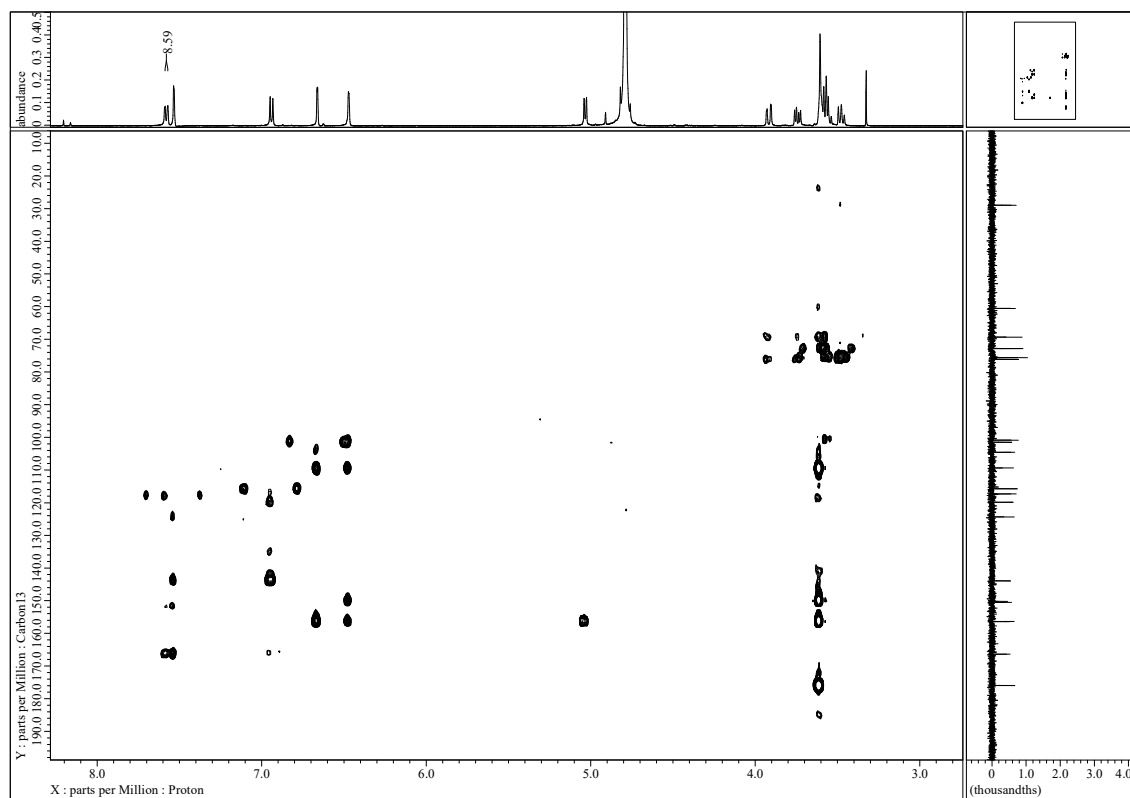

Figure S7.  $^1\text{H}$ - $^1\text{H}$  NOESY spectrum of compound 1.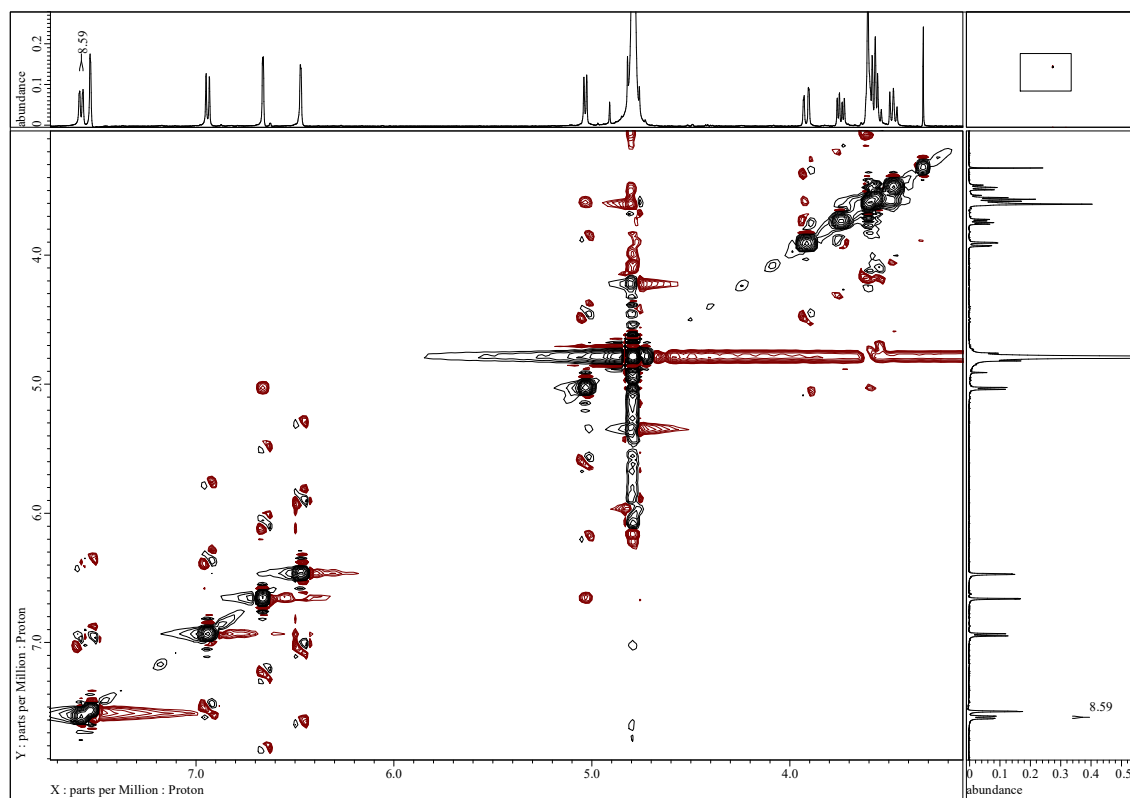

Figure S8. IR spectrum of compound 1.

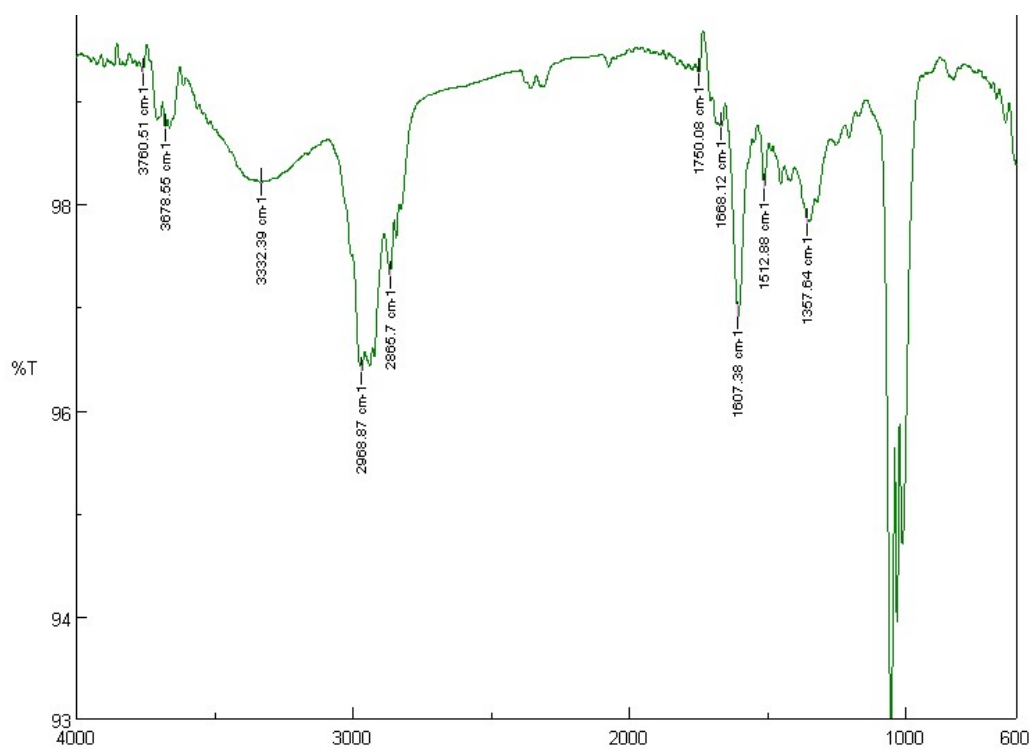



Figure S9. Extracted Ion Chromatogram (EIC) for sugar analysis of L-glucose, D-glucose and, hydrolyzed compound 1.

RT :9.50-13.00

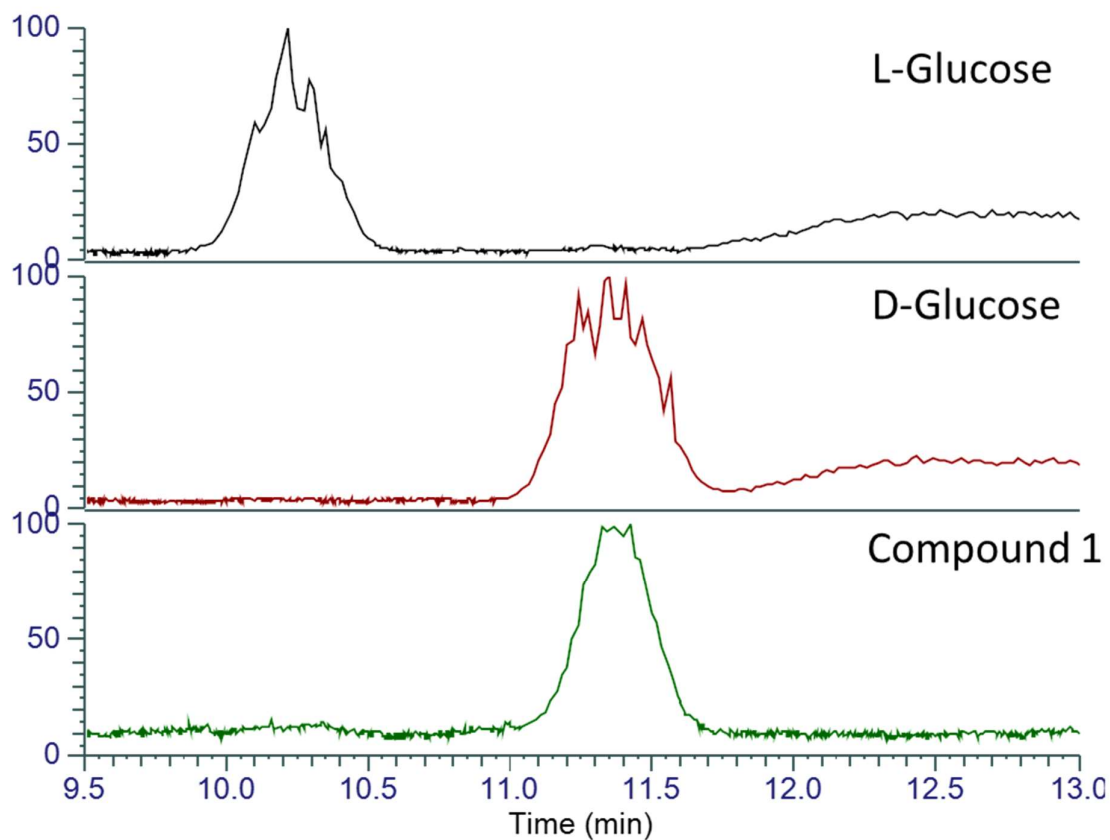

Figure S10. The effect of compounds **1** and **2** on NHDF cell viability. The cells were treated with (1-100  $\mu\text{M}$ ) concentrations of the compound for 24 h. The effects of the compounds on cell viability were performed using an EZ-Cytox solution. The data were depicted as mean  $\pm$  SD ( $n=3$ ).

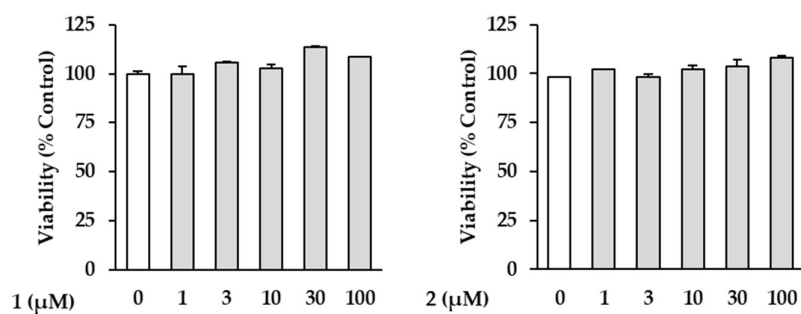

Supplement: s1 [file s1]
